# Supplementary material for: An interlayer composed of a porous carbon sheet embedded with TiO2 nanoparticles for stable and high rate lithium–sulfur batteries
Source: Royal Society of Chemistry journal article supplement (doi:10.1039/d0nr02607g), 2020-01-01
Supplement: d0nr02607g1.pdf [file d0nr02607g1.pdf]

Supporting Information

## **An interlayer composed of porous carbon sheet embedded with TiO<sub>2</sub> nanoparticles for stable and high rate lithium-sulfur batteries**

Yushan Jiang, <sup>‡a</sup> Yaqian Deng, <sup>‡a</sup> Bin Zhang, <sup>‡a</sup> Wuxing Hua, <sup>b</sup> Xinliang Wang, <sup>a</sup> Qi Qi, <sup>a</sup> Qiaowei Lin, <sup>a</sup> Wei Lv <sup>\*a</sup>

*<sup>a</sup> Shenzhen Key Laboratory for Graphene-based Materials, Engineering Laboratory for Functionalized Carbon Materials, Tsinghua Shenzhen International Graduate School, Tsinghua University, Shenzhen, 518055, China. lv.wei@sz.tsinghua.edu.cn*

*<sup>b</sup> Nanoyang Group, State Key Laboratory of Chemical Engineering, School of Chemical Engineering and Technology, Collaborative Innovation Center of Chemical Science and Engineering (Tianjin), Tianjin University, Tianjin 300072, China*

*<sup>‡</sup>These authors are equal main contributors*

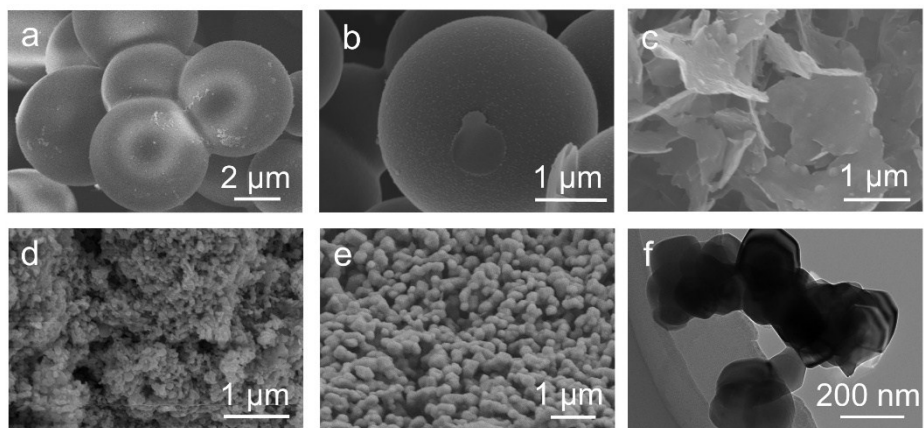

**Fig. S1** SEM images of PCS before (a) and after (b) the heat treatment, (c) CNS-Ti<sub>3</sub>C<sub>2</sub>T<sub>x</sub> and (d) TiO<sub>2</sub> obtained after hydrothermal treatment. (e) SEM and (f) TEM images of TiO<sub>2</sub> after the heat treatment.

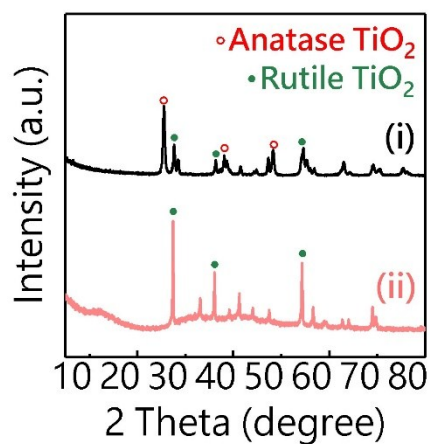

**Fig. S2** XRD patterns of TiO<sub>2</sub> (i) after hydrothermal treatment and (ii) after annealing at 900 °C.

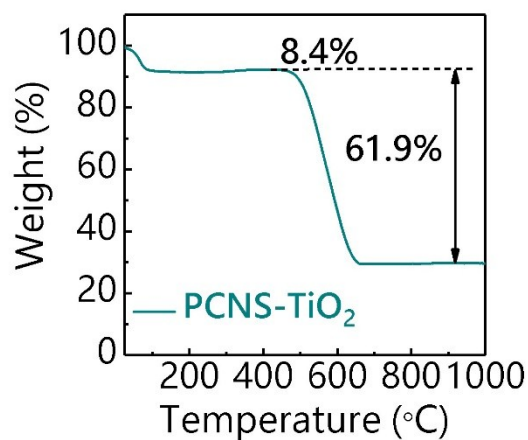

**Fig. S3** TG profile of PCNS-TiO<sub>2</sub> in the atmosphere, showing the TiO<sub>2</sub> content is about 32.4 wt%.

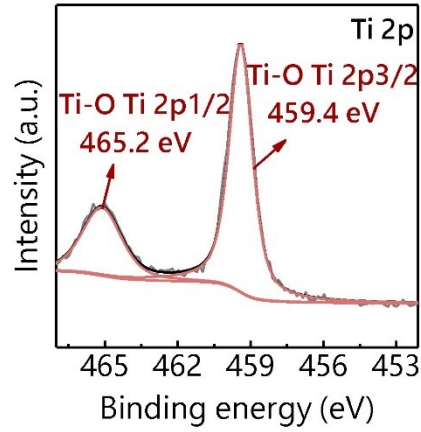

**Fig. S4** Ti 2p XPS spectrum of PCNS-TiO<sub>2</sub>.

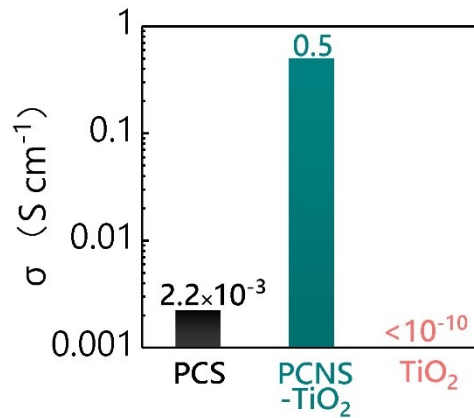

**Fig. S5** Electrical conductivities of PCS, PCNS-TiO<sub>2</sub> and TiO<sub>2</sub> interlayers on the separators measured by a four-point probe method.

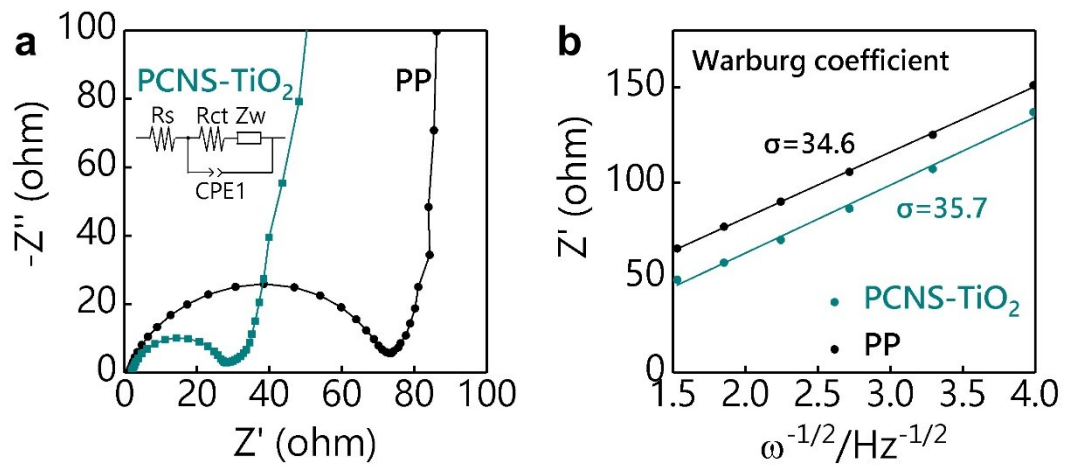

**Fig. S6** (a) EIS plots and (b) the calculated Warburg coefficients of Li-S batteries with PP separator and PCNS-TiO<sub>2</sub> coated separator.

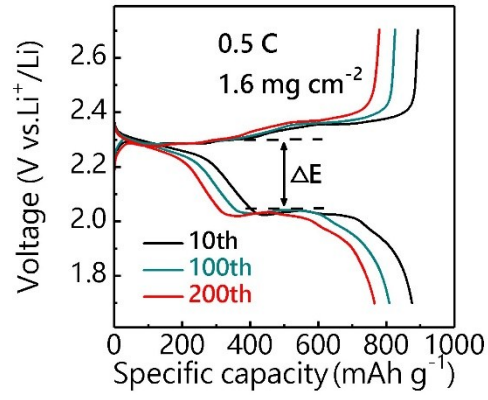

**Fig. S7** Galvanostatic charge/discharge profiles at 0.5 C of the Li-S battery with the PCNS-TiO<sub>2</sub> interlayer with the sulfur loading of 1.6 mg cm<sup>-2</sup>.
